# Supplementary material
Source: Hindawi journal article supplement (doi:10.1155/2011/695413)
Supplement: f1 [file 695413.f1.pdf]

supplementary figure 1

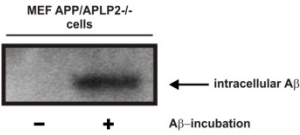

| <i>Age at death</i> | <i>B&amp;B</i> | <i>CERAD</i> | <i>NP -Diagnosis</i> | <i>sex</i> |
|---------------------|----------------|--------------|----------------------|------------|
| 46                  | I              | 0            | control              | F          |
| 56                  | VI             | C            | AD                   | F          |
| 53                  | n.d.           | n.d.         | control              | F          |
| 65                  | V-VI           | C            | AD                   | F          |
| 55                  | 0              | 0            | control              | F          |
| 68                  | VI             | C            | AD                   | F          |
| 67                  | V-VI           | C            | AD                   | F          |
| 75                  | III-IV         | B            | control              | F          |
| 73                  | V-VI           | C            | AD                   | F          |
| 75                  | VI             | C            | AD                   | F          |
| 73                  | n.d.           | n.d.         | AD                   | F          |
| 76                  | III-IV         | C            | control              | F          |
| 76                  | V-VI           | C            | AD                   | F          |
| 78                  | V-VI           | C            | AD                   | F          |
| 77                  | II             | C            | control              | F          |
| 78                  | VI             | C            | AD                   | F          |
| 78                  | VI             | C            | AD                   | F          |
| 79                  | V              | C            | AD                   | F          |
| 77                  | II             | A            | control              | F          |
| 80                  | V              | C            | AD                   | F          |
| 82                  | V              | C            | AD                   | F          |
| 85                  | VI             | C            | AD                   | F          |
| 80                  | III-IV         | 0            | control              | F          |
| 82                  | V-VI           | C            | AD                   | F          |
| 85                  | III            | C            | AD                   | F          |
| 85                  | IV             | C            | AD                   | F          |
| 83                  | II             | 0            | control              | F          |
| 81                  | n.d.           | n.d.         | AD                   | F          |
| 88                  | VI             | C            | AD                   | F          |
| 90                  | n.d.           | n.d.         | AD                   | F          |
| 85                  | I              | 0            | control              | F          |
| 88                  | V              | C            | AD                   | F          |
| 89                  | III-IV         | C            | AD                   | F          |

| <i>Age at death</i> | <i>B&amp;B</i> | <i>CERAD</i> | <i>NP -Diagnosis</i> | <i>sex</i> |
|---------------------|----------------|--------------|----------------------|------------|
| 88                  | I-II           | B            | control              | F          |
| 93                  | V-VI           | C            | AD                   | F          |
| 93                  | V              | C            | AD                   | F          |
| 97                  | V              | C            | AD                   | F          |
| 50                  | 0              | 0            | control              | M          |
| 62                  | VI             | C            | AD                   | M          |
| 53                  | I              | 0            | control              | M          |
| 70                  | VI             | C            | AD                   | M          |
| 54                  | 0              | 0            | control              | M          |
| 73                  | V-VI           | C            | AD                   | M          |
| 59                  | I-II           | 0            | control              | M          |
| 75                  | VI             | C            | AD                   | M          |
| 60                  | 0              | 0            | control              | M          |
| 76                  | V              | B            | AD                   | M          |
| 61                  | 0              | 0            | control              | M          |
| 80                  | V              | C            | AD                   | M          |
| 63                  | I              | 0            | control              | M          |
| 80                  | V              | C            | AD                   | M          |
| 71                  | 0-I            | 0            | control              | M          |
| 83                  | VI             | C            | AD                   | M          |
| 85                  | III-IV         | B            | control              | M          |
| 87                  | V              | C            | AD                   | M          |
| 87                  | V              | C            | AD                   | M          |
| 87                  | I-II           | 0            | control              | M          |
| 93                  | IV             | B            | AD                   | M          |
| 18                  | 0              | 0            | control              | M          |
| 39                  | VI             | C            | AD                   | M          |
| 46                  | 0              | 0            | control              | M          |
| 49                  | VI             | C            | AD                   | M          |
| 53                  | 0              | n.d.         | control              | M          |
| 57                  | VI             | C            | AD                   | M          |

Supplemental table 1: Overview of human SAD and corresponding control brains used in this study.

| <i>Age at death</i> | <i>B&amp;B</i> | <i>CERAD</i> | <i>NP -Diagnosis</i> | <i>sex</i> |
|---------------------|----------------|--------------|----------------------|------------|
| 46                  | 0              | 0            | control              | M          |
| 39                  | VI             | C            | FAD (I143T)          | M          |
| 55                  | 0              | 0            | control              | F          |
| 57                  | VI             | C            | FAD (L174R)          | F          |
| 53                  | 0              | n.d.         | control              | M          |
| 57                  | VI             | C            | FAD (L286V)          | M          |

Supplemetanl table 2: Overview of human FAD and corresponding control brains used in this study.
